# Supplementary material for: Evolutionary analyses and expression patterns of TCP genes in Ranunculales
Source: Front Plant Sci. 2022 Dec 1;13:1055196. doi: 10.3389/fpls.2022.1055196 (PMC9752903; doi:10.3389/fpls.2022.1055196)
Supplement: Supplementary Table 1 — List of primers used. [file DataSheet_2.xlsx]

## Sheet: SupTable1
List of primers	primers on gray background were specifically used for genome walking
Name	Sequence 5'->3'
CYL1_L	GACAGTCTAGTGAGGGAGGG
CYL1_L461	GAGAATCTCACTGTTAACGCGA
CYL1_U	CAACCGGCACAGCAAAATTG
CYL1_U258	ACTTCCCAAGCTTCTCACTCA
CYL1_699U	TGGGACATTGATTCAGTGGGA
CYL2_L1241	CTAGGGCTGCCAAGATTTCTCC
CYL2_L683	GGCAACCACATCTAGAGGCT
CYL2_L881	GTCGACGGAGGATTTCTTTGA
CYL2_U569	TGCTGAGACCAAGAGTGCTA
CYL2_U77	ATGCCACGTCCATGTTGAGG
CYL2_U819	CCCTCTGAGAATGGTGGTG
TCP11_L884	GAAAACCTCCCAAACCCAAGA
TCP11_U59	TCTCTAAACACAAGCCCTCTTCT
TCP11cds_L640	TGCCCACTCCATCTTCATCA
TCP11cds_U163	CATCTAAAGGTGAACGGCCG
TCP151_L1520	CACAACAGCATCAAAACCACAC
TCP151_U45	TGCAAGACCAACCAAAGCTT
TCP151cds_L930	CACTTGAACCAGACCCTCGA
TCP151cds_U431	TGCACCCTCACAGTTAAGGT
TCP152_L1410	GAAGCCATTTCCAACCCTAAAA
TCP152_U32	CCCTCCTTCTACCTTCCATCA
TCP152cds_L416	CATACTTGAACCGGAGCTGC
TCP152cds_U5	TGAGAATGGAACTCGGAGGC
TCP2_L2294	CCTTCAATGCTTTTCTTTCCCC
TCP2_L2524	AGCAAGAAAGGATTGTTCGAGA
TCP2_L2599	AAACACTGACCGACTCTGGA
TCP2_L925	TCATGAATCTCCTCCATCTCCA
TCP2_U2214	GGGTTTGATGGCAGCTTACA
TCP2_U2275	GGAAAGAAAAGCATTGAAGGGT
TCP2_U238	CAAGGAACACAACCACACGA
TCP2_U750	GCTACTCACCTGCAATTACTACT
TCP201_L1183	GTTTGCAACAACTCCAAGTAGA
TCP201_U7	GGTCTAGGTCTTTTCAGGTGC
TCP201cds_L768	CAGTACCCCGATATGCCCAT
TCP201cds_U358	ACTGGCACTGGGACTATACC
TCP202_L1401	CCAACCACAAGCAATTCAGC
TCP202_L490	GCACATAAAGCTGGCATCCT
TCP202_U18	GGGTTTGGGTTTTGGGTTGT
TCP202cds_L558	ACTGACAGAGGGCCATAACC
TCP202cds_U232	AGGATGCCAGCTTTATGTGC
TCP22_L1315	TATCTCCTCCTCCTCCTCCC
TCP22_L1494	TGGCAGGAAGAGTGAACACA
TCP22_L621	AGCCATAGATGAGTGACCACC
TCP22_L873	ACCTTGCGCAGTTTGTTCAT
TCP22_U3	TCACAACACAAGTCAGAAAGTCA
TCP22_U387	TGGAAGAGGTCGGCGTATAC
TCP22_U729	TAATGGTGCTGGTGGTGCTA
TCP2cds_L1142	GCAAGGCCAGAAGAAATGCT
TCP2cds_U762	CCCAAATCAATCCACCCCAC
TCP4_L2210	CGCTGGAATACGAAACCCTG
TCP4_L2488	GCATAGCAAACCCGGGAAAA
TCP4_L841	TCTGGGTGGTCTTGGTCTTC
TCP4_U2191	CAGGGTTTCGTATTCCAGCG
TCP4_U26	AGAGGTGGTGGTGTGCTG
TCP4_U825	GACCAAGACCACCCAGAAGA
TCP4cds_U679	GACCCAATGCTTCTTCACCA
TCP5_L1615	AATTAGATGCCTCGCCATGC
TCP5_L1738	AGATGTTCTATGGCTGACTCGT
TCP5_U1451	CCCTCAAAACTCCAACGCAA
TCP5_U150	AGTGACATTAGGTTTCAGGCC
TCP5cds_L803	TGGCTTCCAAAATGCGACAA
TCP5cds_U316	GATGAACTCCCTCCACTCCC
TCP7_L1092	CAGTGTTTCTTCCATCGCCA
TCP7_U4	CCTTCCTTCCTTCTCCCTCC
TCP7cds_594	CACCATTTCAGGAGCAGCAG
TCP7cds_U96	TGGAGGTTTGACGGTGAAGA
TCP91_L1210	GTTGCTTTGAAGAACGACCC
TCP91_L1210	GTTGCTTTGAAGAACGACCC
TCP91_L904	TTACCACCAGCACCAAAAGC
TCP91_U271	AGGAGGAGGAGAAGGAGAAGA
TCP91_U724	CCAAACACAGAGACGGATGC
TCP91A_L	ACGAATCCTTCTTCCTCTTCCT
TCP91A_U	CTGGTGTGCTTGTGTGTGTT
TCP92_L1215	CACTTTGGAAGCCGGTTTGA
TCP92_U20	GGTTTCCTCAGCTCATTTCCA
TCP92cds_L767	GTTTGAGGCTGAACTTGGGG
TCP92cds_U301	TGGCTTCTTGAAAACGCTGA
Actin_U	AACTGGGATGATATGGAGAA
Actin_L	CCTCCAATCCAGACACTGTA
TCP22C_R	TGCTGTGATTCCATTTCTTTCTCAATAAAA
TCP22B_R	TTGTTTCTGCTGCTGTGATTCCA
TCP22A_R	AGCTGCAATGAGGGAGAAGGT
NdCYL1C_R	TTCGACTTGGTCAGCAGCCA
NdCYL1B_R	GTGAGACACACTTCTGGAGAGCT
NdCYL1A_R	AGCCACTCTTGACACTTCCAGT

## Sheet: SupTable2
Gene references and abreviations for the 6 species of the complete repertoire analysis.
Arabidopsis thaliana genes
At1g67260	AtTCP1
At2g31070	AtTCP10
At2g37000	AtTCP11
At1g68800	AtTCP12
At3g02150	AtTCP13
At3g47620	AtTCP14
At1g69690	AtTCP15
At3g45150	AtTCP16
At5g08070	AtTCP17
At3g18550	AtTCP18
At5g51910	AtTCP19
At4g18390	AtTCP2
At3g27010	AtTCP20
At5g08330	AtTCP21
At1g72010	AtTCP22
At1g35560	AtTCP23
At1g30210	AtTCP24
At1g53230	AtTCP3
At3g15030	AtTCP4
At5g60970	AtTCP5
At5g41030	AtTCP6
At5g23280	AtTCP7
At1g58100	AtTCP8
At2g45680	AtTCP9
Vitis vinifera genes
GSVIVT01008023001 CDS	Vv08023
GSVIVT01008109001 CDS	Vv08109
GSVIVT01008234001 CDS	Vv08234
GSVIVT01011962001 CDS	Vv11962
GSVIVT01014236001 CDS	Vv14236
GSVIVT01019876001 CDS	Vv19876
GSVIVT01020011001 CDS	Vv20011
GSVIVT01020666001 CDS	Vv20666
GSVIVT01021167001 CDS	Vv21167
GSVIVT01021528001 CDS	Vv21528
GSVIVT01023283001 CDS	Vv23283
GSVIVT01026145001 CDS	Vv26145
GSVIVT01027588001 CDS	Vv27588
GSVIVT01032911001 CDS	Vv32911
GSVIVT01036449001 CDS	Vv36449
XM_010662427.2 PREDICTED: Vitis vinifera transcription factor TCP20 (LOC100253170), mRNA	VvTCP20
XM_002281927.3 PREDICTED: Vitis vinifera transcription factor TCP11 (LOC100243103), mRNA	VvTCP11
XM_002272192.4 PREDICTED: Vitis vinifera transcription factor TCP8 (LOC100266605), mRNA	VvTCP8
Oryza sativa japonica genes
LOC_Os01g11550.1|Oryza_sativa_subsp._japonica|TCP|LOC_Os01g11550.1	Os01g11550
LOC_Os01g55750.1|Oryza_sativa_subsp._japonica|TCP|LOC_Os01g55750.1	Os01g55750
LOC_Os01g69980.1|Oryza_sativa_subsp._japonica|TCP|LOC_Os01g69980.1	Os01g69980
LOC_Os02g42380.1|Oryza_sativa_subsp._japonica|TCP|LOC_Os02g42380.1	Os02g42380
LOC_Os02g51280.1|Oryza_sativa_subsp._japonica|TCP|LOC_Os02g51280.1	Os02g51280
LOC_Os02g51310.1|Oryza_sativa_subsp._japonica|TCP|LOC_Os02g51310.1	Os02g51310
LOC_Os03g49880.1|Oryza_sativa_subsp._japonica|TCP|LOC_Os03g49880.1	Os03g49880
LOC_Os03g57190.1|Oryza_sativa_subsp._japonica|TCP|LOC_Os03g57190.1	Os03g57190
LOC_Os04g11830.1|Oryza_sativa_subsp._japonica|TCP|LOC_Os04g11830.1	Os04g11830
LOC_Os04g44440.1|Oryza_sativa_subsp._japonica|TCP|LOC_Os04g44440.1	Os04g44440
LOC_Os05g43760.1|Oryza_sativa_subsp._japonica|TCP|LOC_Os05g43760.1	Os05g43760
LOC_Os06g12230.1|Oryza_sativa_subsp._japonica|TCP|LOC_Os06g12230.1	Os06g12230
LOC_Os07g05720.1|Oryza_sativa_subsp._japonica|TCP|LOC_Os07g05720.1	Os07g05720
LOC_Os08g33530.1|Oryza_sativa_subsp._japonica|TCP|LOC_Os08g33530.1	Os08g33530
LOC_Os08g43160.1|Oryza_sativa_subsp._japonica|TCP|LOC_Os08g43160.1	Os08g43160
LOC_Os09g24480.1|Oryza_sativa_subsp._japonica|TCP|LOC_Os09g24480.1	Os09g24480
LOC_Os09g34950.1|Oryza_sativa_subsp._japonica|TCP|LOC_Os09g34950.1	Os09g34950
LOC_Os11g07460.1|Oryza_sativa_subsp._japonica|TCP|LOC_Os11g07460.1	Os11g07460
LOC_Os12g02090.1|Oryza_sativa_subsp._japonica|TCP|LOC_Os12g02090.1	Os12g02090
LOC_Os12g07480.1|Oryza_sativa_subsp._japonica|TCP|LOC_Os12g07480.1	Os12g07480
LOC_Os12g42190.1|Oryza_sativa_subsp._japonica|TCP|LOC_Os12g42190.1	Os12g42190
Nelumbo nucifera genes
NNU_000404-RA	Nnu000404
NNU_000986-RA	Nnu000986
NNU_001168-RA	Nnu001168
NNU_003157-RA	Nnu003157
NNU_006850-RA	Nnu006850
NNU_019579-RA	Nnu019579
NNU_020671-RA	Nnu020671
NNU_022609-RA	Nnu022609
NNU_026089-RA	Nnu026089
XM_010259728.2 PREDICTED: Nelumbo nucifera transcription factor TCP5-like (LOC104597931), transcript variant X1, mRNA	Nnu59728
XM_010266979.2 PREDICTED: Nelumbo nucifera transcription factor DICHOTOMA (LOC104603052), mRNA	Nnu66979
XM_010260090.2 PREDICTED: Nelumbo nucifera transcription factor TCP14 (LOC104598158), mRNA	Nnu60090
XM_010258787.2 PREDICTED: Nelumbo nucifera transcription factor TCP15-like (LOC104597313), transcript variant X1, mRNA	Nnu58787
XM_010247915.2 PREDICTED: Nelumbo nucifera transcription factor TCP7-like (LOC104589565), mRNA	Nnu47915
XM_010252336.1 PREDICTED: Nelumbo nucifera transcription factor TCP20 (LOC104592830), mRNA	Nnu52336
XM_010274283.2 PREDICTED: Nelumbo nucifera transcription factor TCP9-like (LOC104608334), mRNA	Nnu74283
Aquilegia coerulea genes
Aqcoe1G137200	AqTCP11
Aqcoe1g240000	AqTCP4
Aqcoe3G008000	AqTCP7
Aqcoe3G048600	AqCYL1
Aqcoe3G081500	AqTCP15-2
Aqcoe3G164300	AqTCP20-2
Aqcoe3G335300	AqTCP15-1
Aqcoe3g370100	AqTCP5
Aqcoe3G395500	AqCYL2
Aqcoe4g007100	AqTCP2
Aqcoe5G347900	AqTCP20-1
Aqcoe5G422600	AqTCP9-2
Aqcoe6G015800	AqTCP22
Aqcoe7G051800	AqTCP9-1
Amborella trichopodagenes
evm_27.model.AmTr_v1.0_scaffold00009.28	Atr00009
evm_27.model.AmTr_v1.0_scaffold00010.407	Atr00010
evm_27.model.AmTr_v1.0_scaffold00016.212	Atr00016
evm_27.model.AmTr_v1.0_scaffold00017.13	Atr00017
evm_27.model.AmTr_v1.0_scaffold00029.28	Atr00029a
evm_27.model.AmTr_v1.0_scaffold00069.147	Atr00069
evm_27.model.AmTr_v1.0_scaffold00029.440	Atr00029b
evm_27.model.AmTr_v1.0_scaffold00007.18	Atr00007
evm_27.model.AmTr_v1.0_scaffold00021.111	Atr00021
evm_27.model.AmTr_v1.0_scaffold00119.112	Atr00119
evm_27.model.AmTr_v1.0_scaffold00133.18	Atr00133
evm_27.model.AmTr_v1.0_scaffold00154.48	Atr00154
evm_27.model.AmTr_v1.0_scaffold00092.72	Atr00092
evm_27.model.AmTr_v1.0_scaffold00224.2	Atr00224
evm_27.model.AmTr_v1.0_scaffold00357.2	Atr00357

## Sheet: SupTable3A
Gene references and abbreviations for class I sequences of Ranunculales
Database Reference (XM:GenBank; others:OneKP; NGS_RAN_2015: transcriptomic data)	Protein/cds abbrev.	Family
XM_026583999.1 PREDICTED: Papaver somniferum transcription factor TCP11-like (LOC113338620), mRNA	PasomT11_1	Papaveraceae
XM_026556670.1 PREDICTED: Papaver somniferum transcription factor TCP11-like (LOC113308190), mRNA	PasomT11_2	Papaveraceae
XM_026545539.1 PREDICTED: Papaver somniferum transcription factor TCP9-like (LOC113297131), mRNA	PasomT9_1	Papaveraceae
XM_026551291.1 PREDICTED: Papaver somniferum transcription factor TCP9-like (LOC113302382), mRNA	PasomT9_2	Papaveraceae
XM_026554319.1 PREDICTED: Papaver somniferum transcription factor TCP19-like (LOC113305239), mRNA	PasomT19_1	Papaveraceae
XM_026524224.1 PREDICTED: Papaver somniferum transcription factor TCP19-like (LOC113274824), mRNA	PasomT19_2	Papaveraceae
XM_026521607.1 PREDICTED: Papaver somniferum transcription factor TCP20-like (LOC113271704), mRNA	PasomT20_6	Papaveraceae
XM_026529627.1 PREDICTED: Papaver somniferum transcription factor TCP20-like (LOC113280997), mRNA	PasomT20_7	Papaveraceae
XM_026598486.1 PREDICTED: Papaver somniferum transcription factor TCP21-like (LOC113355590), mRNA	PasomT21_1	Papaveraceae
XM_026552408.1 PREDICTED: Papaver somniferum transcription factor TCP7-like (LOC113303376), mRNA	PasomT7_1	Papaveraceae
XM_026533903.1 PREDICTED: Papaver somniferum transcription factor TCP21-like (LOC113284445), mRNA	PasomT21_2	Papaveraceae
XM_026548639.1 PREDICTED: Papaver somniferum transcription factor TCP7-like (LOC113299589), mRNA	PasomT7_2	Papaveraceae
XM_026525559.1 PREDICTED: Papaver somniferum transcription factor TCP14-like (LOC113275972), mRNA	PasomT14_1	Papaveraceae
XM_026566925.1 PREDICTED: Papaver somniferum transcription factor TCP15-like (LOC113318706), mRNA	PasomT15_5	Papaveraceae
XM_026546631.1 PREDICTED: Papaver somniferum transcription factor TCP15-like (LOC113298004), mRNA	PasomT15_6	Papaveraceae
CCID_2018855 Akebia_trifoliata	Aktri1	Lardizabalaceae
CCID_2017741 Akebia_trifoliata	Aktri2	Lardizabalaceae
CCID_2006466 Akebia_trifoliata	Aktri3	Lardizabalaceae
CCID_2016740 Akebia_trifoliata	Aktri4	Lardizabalaceae
ZUHO_2007618 Anemone_hupenhensis	Anhup1	Ranunculaceae
ZUHO_2141241 Anemone_hupenhensis	Anhup2	Ranunculaceae
ZUHO_2008908 Anemone_hupenhensis	Anhup3	Ranunculaceae
ZUHO_2012621 Anemone_hupenhensis	Anhup4	Ranunculaceae
ZUHO_2141072 Anemone_hupenhensis	Anhup5	Ranunculaceae
UPOG_2009681 Anemone_pulsatilla	Anpul1	Ranunculaceae
UPOG_2056202 Anemone_pulsatilla	Anpul2	Ranunculaceae
UPOG_2056478 Anemone_pulsatilla	Anpul3	Ranunculaceae
UPOG_2009810 Anemone_pulsatilla	Anpul4	Ranunculaceae
GOQJ_2003517 Argemone_mexicana	Armex1	Papaveraceae
SMZF_2009037 Argemone_mexicana	Armex2	Papaveraceae
SMZF_2008296 Argemone_mexicana	Armex3	Papaveraceae
GOQJ_2011961 Argemone_mexicana	Armex4	Papaveraceae
GOQJ_2004583 Argemone_mexicana	Armex5	Papaveraceae
CCHG_2017485 Argemone_mexicana	Armex7	Papaveraceae
GOQJ_2062632 Argemone_mexicana	Armex8	Papaveraceae
AUGV_2012336 Capnoides_sempervirens	Casem1	Papaveraceae
AUGV_2009178 Capnoides_sempervirens	Casem2	Papaveraceae
AUGV_2010130 Capnoides_sempervirens	Casem3	Papaveraceae
AUGV_2053694 Capnoides_sempervirens	Casem4	Papaveraceae
UDHA_2012677 Ceratocapnos_vesicaria	Ceves1	Papaveraceae
UDHA_2022790 Ceratocapnos_vesicaria	Ceves2	Papaveraceae
UDHA_2022791 Ceratocapnos_vesicaria	Ceves3	Papaveraceae
XMVD_2006070 Chelidonium_majus	Chmaj1	Papaveraceae
XMVD_2051792 Chelidonium_majus	Chmaj2	Papaveraceae
ZGQD_2002442 Corydalis_linstowiana	Colin1	Papaveraceae
ZGQD_2002441 Corydalis_linstowiana	Colin2	Papaveraceae
RKGT_2014831 Eschscholzia_californica	Escal1	Papaveraceae
RKGT_2017984 Eschscholzia_californica	Escal10	Papaveraceae
ERXG_2065073 Eschscholzia_californica	Escal11	Papaveraceae
ERXG_2008416 Eschscholzia_californica	Escal2	Papaveraceae
RKGT_2016149 Eschscholzia_californica	Escal3	Papaveraceae
NJKC_2003935 Eschscholzia_californica	Escal4	Papaveraceae
UNPT_2001513 Eschscholzia_californica	Escal6	Papaveraceae
TUHA_2017577 Eschscholzia_californica	Escal9	Papaveraceae
QTJY_2012391 Euptelea_pleiosperma	Euple1	Eupteleaceae
QTJY_2014232 Euptelea_pleiosperma	Euple2	Eupteleaceae
QTJY_2058513 Euptelea_pleiosperma	Euple3	Eupteleaceae
QTJY_2002187 Euptelea_pleiosperma	Euple4	Eupteleaceae
QTJY_2016739 Euptelea_pleiosperma	Euple5	Eupteleaceae
QTJY_2013919 Euptelea_pleiosperma	Euple6	Eupteleaceae
VGHH_2005534 Hydrastis_canadensis	Hycan1	Ranunculaceae
VGHH_2008689 Hydrastis_canadensis	Hycan3	Ranunculaceae
VGHH_2050367 Hydrastis_canadensis	Hycan4	Ranunculaceae
NMGG_2013731 Hypecoum_procumbens	Hypro1	Papaveraceae
NMGG_2013129 Hypecoum_procumbens	Hypro2	Papaveraceae
NMGG_2062142 Hypecoum_procumbens	Hypro3	Papaveraceae
YHFG_2004421 Nandina_domestica	Nadom1	Berberidaceae
YHFG_2072045 Nandina_domestica	Nadom2	Berberidaceae
YHFG_2012277 Nandina_domestica	Nadom3	Berberidaceae
BMRX_2008435 Papaver_somniferum	Pasom1	Papaveraceae
FPYZ_2029729 Papaver_somniferum	Pasom2	Papaveraceae
KKCW_2023755 Papaver_somniferum	Pasom3	Papaveraceae
SUFP_2009379 Papaver_somniferum	Pasom5	Papaveraceae
BMRX_2021733 Papaver_somniferum	Pasom6	Papaveraceae
KKCW_2025636 Papaver_somniferum	Pasom7	Papaveraceae
XHKT_2011936 Sanguinaria_canadensis	Sacan1	Papaveraceae
GBVZ_2013176 Thalictrum_thalictroides	Ththal1	Ranunculaceae
GBVZ_2013804 Thalictrum_thalictroides	Ththal2	Ranunculaceae
GBVZ_2073644 Thalictrum_thalictroides	Ththal3	Ranunculaceae
GBVZ_2018024 Thalictrum_thalictroides	Ththal4	Ranunculaceae
GBVZ_2014434 Thalictrum_thalictroides	Ththal5	Ranunculaceae
GBVZ_2016128 Thalictrum_thalictroides	Ththal6	Ranunculaceae
NGS_Ran_2015_Aconitum_napellus/ACO_014206	Anap014206	Ranunculaceae
NGS_Ran_2015_Aconitum_napellus/ACO_006364	Anap006364	Ranunculaceae
NGS_Ran_2015_Aconitum_napellus/ACO_009969	Anap009969	Ranunculaceae
NGS_Ran_2015_Aconitum_napellus/ACO_021937	Anap021937	Ranunculaceae
NGS_Ran_2015_Aconitum_napellus/ACO_021939	Anap021939	Ranunculaceae
NGS_Ran_2015_Aconitum_napellus/ACO_022730	Anap022730	Ranunculaceae
NGS_Ran_2015_Aconitum_napellus/ACO_028027	Anap028027	Ranunculaceae
NGS_Ran_2015_Aconitum_napellus/ACO_028029	Anap028029	Ranunculaceae
NGS_Ran_2015_Aconitum_napellus/ACO_008890	Anap008890	Ranunculaceae
NGS_Ran_2015_Aconitum_napellus/ACO_046339	Anap046339	Ranunculaceae
NGS_Ran_2015_Aconitum_napellus/ACO_046105	Anap046105	Ranunculaceae
NGS_Ran_2015_Aconitum_napellus/ACO_030366	Anap030366	Ranunculaceae
NGS_Ran_2015_Aconitum_napellus/ACO_030367	Anap030367	Ranunculaceae
NGS_Ran_2015_Aconitum_napellus/ACO_030368	Anap030368	Ranunculaceae
NGS_Ran_2015_Clematis_stans/CLE_11079	Csta11079	Ranunculaceae
NGS_Ran_2015_Clematis_stans/CLE_31314	Csta31314	Ranunculaceae
NGS_Ran_2015_Clematis_stans/CLE_24380	Csta24380	Ranunculaceae
NGS_Ran_2015_Clematis_stans/CLE_27089	Csta27089	Ranunculaceae
NGS_Ran_2015_Clematis_stans/CLE_11598	Csta11598	Ranunculaceae
NGS_Ran_2015_Clematis_stans/CLE_18638	Csta18638	Ranunculaceae
NGS_Ran_2015_Clematis_stans/CLE_07193	Csta07193	Ranunculaceae
NGS_Ran_2015_Ficaria_verna/FIC_11503	Fver11503	Ranunculaceae
NGS_Ran_2015_Ficaria_verna/FIC_33093	Fver33093	Ranunculaceae
NGS_Ran_2015_Ficaria_verna/FIC_23012	Fver23012	Ranunculaceae
NGS_Ran_2015_Ficaria_verna/FIC_15308	Fver15308	Ranunculaceae
NGS_Ran_2015_Ficaria_verna/FIC_04625	Fver04625	Ranunculaceae
NGS_Ran_2015_Ficaria_verna/FIC_28920	Fver28920	Ranunculaceae
NGS_Ran_2015_Ficaria_verna/FIC_27551	Fver27551	Ranunculaceae
NGS_Ran_2015_Ficaria_verna/FIC_35544	Fver35544	Ranunculaceae
NGS_Ran_2015_Ficaria_verna/FIC_08745	Fver08745	Ranunculaceae
NGS_Ran_2015_Helleborus_orientalis/HEL_34122	Hori34122	Ranunculaceae
NGS_Ran_2015_Helleborus_orientalis/HEL_34123	Hori34123	Ranunculaceae
NGS_Ran_2015_Helleborus_orientalis/HEL_31799	Hori31799	Ranunculaceae
NGS_Ran_2015_Helleborus_orientalis/HEL_31800	Hori31800	Ranunculaceae
NGS_Ran_2015_Helleborus_orientalis/HEL_31801	Hori31801	Ranunculaceae
NGS_Ran_2015_Helleborus_orientalis/HEL_31802	Hori31802	Ranunculaceae
NGS_Ran_2015_Helleborus_orientalis/HEL_10341	Hori10341	Ranunculaceae
NGS_Ran_2015_Helleborus_orientalis/HEL_10342	Hori10342	Ranunculaceae
NGS_Ran_2015_Helleborus_orientalis/HEL_10343	Hori10343	Ranunculaceae
NGS_Ran_2015_Helleborus_orientalis/HEL_23645	Hori23645	Ranunculaceae
NGS_Ran_2015_Helleborus_orientalis/HEL_06176	Hori06176	Ranunculaceae
NGS_Ran_2015_Helleborus_orientalis/HEL_05179	Hori05179	Ranunculaceae
NGS_Ran_2015_Helleborus_orientalis/HEL_24548	Hori24548	Ranunculaceae
NGS_Ran_2015_Helleborus_orientalis/HEL_03509	Hori03509	Ranunculaceae
NGS_Ran_2015_Helleborus_orientalis/HEL_03511	Hori03511	Ranunculaceae
RN005256	NdTCP7	Ranunculaceae
RN006358	NdTCP9-1	Ranunculaceae
RN065983	NdTCP9-2	Ranunculaceae
RN071097	NdTCP11	Ranunculaceae
RN048267	NdTCP14	Ranunculaceae
RN067927	NdTCP15	Ranunculaceae
RN010851	NdTCP20-1	Ranunculaceae
RN015628	NdTCP20-2	Ranunculaceae
RN054028	NdTCP22	Ranunculaceae
Aqcoe3G008000	AqTCP7	Ranunculaceae
Aqcoe7G051800	AqTCP9-1	Ranunculaceae
Aqcoe5G422600	AqTCP9-2	Ranunculaceae
Aqcoe1G137200	AqTCP11	Ranunculaceae
Aqcoe3G335300	AqTCP14	Ranunculaceae
Aqcoe3G081500	AqTCP15	Ranunculaceae
Aqcoe5G347900	AqTCP20-1	Ranunculaceae
Aqcoe3G164300	AqTCP20-2	Ranunculaceae
Aqcoe6G015800	AqTCP22	Ranunculaceae

## Sheet: SupTable3B
Gene references and abbreviations for class II sequences of Ranunculales
Database Reference (XM:GenBank; others:OneKP; NGS_RAN_2015: transcriptomic data)	Protein/cds abbrev.	Family
gnl|onekp|GBVZ_scaffold_2003949 Thalictrum_thalictroides	ThtalCINc	Ranunculaceae
gnl|onekp|YHFG_scaffold_2077669 Nandina_domestica	NadomCINb	Berberidaceae
gnl|onekp|VGHH_scaffold_2051304 Hydrastis_canadensis	HycanCINc	Ranunculaceae
gnl|onekp|UPOG_scaffold_2010480 Anemone_pulsatilla	AnpulCINb	Ranunculaceae
gnl|onekp|XMVD_scaffold_2052006 Chelidonium_majus	ChmajCINd	Papaveraceae
gnl|onekp|ZGQD_scaffold_2004947 Corydalis_linstowiana	ColinCINc	Papaveraceae
gnl|onekp|AUGV_scaffold_2008198 Capnoides_sempervirens	CasemCINc	Papaveraceae
gnl|onekp|BFMT_scaffold_2003515 Argemone_mexicana	ArmexCINj	Papaveraceae
gnl|onekp|CCHG_scaffold_2007057 Argemone_mexicana	ArmexCINk	Papaveraceae
gnl|onekp|CCHG_scaffold_2007058 Argemone_mexicana	ArmexCINl	Papaveraceae
gnl|onekp|NMGG_scaffold_2013942 Hypecoum_procumbens	HyproCINb	Papaveraceae
gnl|onekp|GBVZ_scaffold_2003489 Thalictrum_thalictroides	ThtalCINb	Papaveraceae
gnl|onekp|VGHH_scaffold_2006254 Hydrastis_canadensis	HycanCINb	Ranunculaceae
gnl|onekp|ZUHO_scaffold_2026119 Anemone_hupenhensis	AnhupCINb	Ranunculaceae
gnl|onekp|UPOG_scaffold_2000987 Anemone_pulsatilla	AnpulCINa	Ranunculaceae
gnl|onekp|CCID_scaffold_2003280 Akebia_trifoliata	AktriCINc	Lardizabalaceae
gnl|onekp|QTJY_scaffold_2003837 Euptelea_pleiosperma	EupleCINc	Eupteleaceae
gnl|onekp|QTJY_scaffold_2003838 Euptelea_pleiosperma	EupleCINd	Eupteleaceae
gnl|onekp|WFBF_scaffold_2044269 Podophyllum_peltatum	PopelCINa	Berberidaceae
gnl|onekp|YHFG_scaffold_2078315 Nandina_domestica	NadomCINa	Berberidaceae
gnl|onekp|QTJY_scaffold_2003840 Euptelea_pleiosperma	EupleCINe	Eupteleaceae
gnl|onekp|XHKT_scaffold_2006715 Sanguinaria_canadensis	SacanCINb	Papaveraceae
gnl|onekp|ZGQD_scaffold_2014571 Corydalis_linstowiana	ColinCINb	Papaveraceae
gnl|onekp|AUGV_scaffold_2006502 Capnoides_sempervirens	CasemCINb	Papaveraceae
gnl|onekp|BFMT_scaffold_2006110 Argemone_mexicana	ArmexCINd	Papaveraceae
gnl|onekp|BFMT_scaffold_2006112 Argemone_mexicana	ArmexCINe	Papaveraceae
gnl|onekp|BFMT_scaffold_2006111 Argemone_mexicana	ArmexCINf	Papaveraceae
gnl|onekp|XMVD_scaffold_2006931 Chelidonium_majus	ChmajCINb	Papaveraceae
gnl|onekp|XMVD_scaffold_2006930 Chelidonium_majus	ChmajCINc	Papaveraceae
gnl|onekp|YDEH_scaffold_2003951 Argemone_mexicana	ArmexCINg	Papaveraceae
gnl|onekp|YDEH_scaffold_2003952 Argemone_mexicana	ArmexCINh	Papaveraceae
gnl|onekp|GOQJ_scaffold_2005541 Argemone_mexicana	ArmexCINi	Papaveraceae
gnl|onekp|CCID_scaffold_2003279 Akebia_trifoliata	AktriCINd	Lardizabalaceae
gnl|onekp|GBVZ_scaffold_2015732 Thalictrum_thalictroides	ThtalCINa	Ranunculaceae
gnl|onekp|VGHH_scaffold_2002636 Hydrastis_canadensis	HycanCINa	Ranunculaceae
gnl|onekp|XHKT_scaffold_2011715 Sanguinaria_canadensis	SacanCINa	Papaveraceae
gnl|onekp|QTJY_scaffold_2014459 Euptelea_pleiosperma	EupleCINa	Eupteleaceae
gnl|onekp|GOQJ_scaffold_2016587 Argemone_mexicana	ArmexCINa	Papaveraceae
gnl|onekp|BFMT_scaffold_2020411 Argemone_mexicana	ArmexCINb	Papaveraceae
gnl|onekp|AUGV_scaffold_2007172 Capnoides_sempervirens	CasemCINa	Papaveraceae
gnl|onekp|CCID_scaffold_2008991 Akebia_trifoliata	AktriCINa	Lardizabalaceae
gnl|onekp|ZGQD_scaffold_2001903 Corydalis_linstowiana	ColinCINa	Papaveraceae
gnl|onekp|QTJY_scaffold_2014458 Euptelea_pleiosperma	EupleCINb	Eupteleaceae
gnl|onekp|XMVD_scaffold_2013815 Chelidonium_majus	ChmajCINa	Papaveraceae
gnl|onekp|CCID_scaffold_2013469 Akebia_trifoliata	AktriCINb	Lardizabalaceae
gnl|onekp|ZUHO_scaffold_2008850 Anemone_hupenhensis	AnhupCINa	Ranunculaceae
gnl|onekp|NMGG_scaffold_2014893 Hypecoum_procumbens	HyproCINa	Papaveraceae
gnl|onekp|FPYZ_scaffold_2031032 Papaver_somniferum	PasomCINa	Papaveraceae
gnl|onekp|BMRX_scaffold_2021317 Papaver_somniferum	PasomCINb	Papaveraceae
gnl|onekp|FPYZ_scaffold_2011034 Papaver_somniferum	PasomCINd	Papaveraceae
gnl|onekp|KKCW_scaffold_2024546 Papaver_somniferum	PasomCINf	Papaveraceae
gnl|onekp|UNPT_scaffold_2058931 Eschscholzia_californica	EscalCINg	Papaveraceae
gnl|onekp|ERXG_scaffold_2014225 Eschscholzia_californica	EscalCINd	Papaveraceae
gnl|onekp|UNPT_scaffold_2016101 Eschscholzia_californica	EscalCINe	Papaveraceae
gnl|onekp|TUHA_scaffold_2017665 Eschscholzia_californica	EscalCINf	Papaveraceae
gnl|onekp|NJKC_scaffold_2005095 Eschscholzia_californica	EscalCINa	Papaveraceae
XM_026529472.1 PREDICTED: Papaver somniferum transcription factor TCP13-like (LOC113280884), mRNA	PasomCINg	Papaveraceae
XM_026536284.1 PREDICTED: Papaver somniferum transcription factor TCP4-like (LOC113287506), mRNA	PasomCINh	Papaveraceae
XM_026556740.1 PREDICTED: Papaver somniferum transcription factor TCP4-like (LOC113308249), mRNA	PasomCINi	Papaveraceae
XM_026595101.1 PREDICTED: Papaver somniferum transcription factor TCP2-like (LOC113351022), mRNA	PasomCINj	Papaveraceae
XM_026596949.1 PREDICTED: Papaver somniferum transcription factor TCP2-like (LOC113353298), mRNA	PasomCINk	Papaveraceae
Aqcoe4g007100	AqTCP2	Ranunculaceae
RN009083	NdTCP2	Ranunculaceae
Aqcoe1g240000	AqTCP4	Ranunculaceae
RN002982	NdTCP4	Ranunculaceae
Aqcoe3g370100	AqTCP5	Ranunculaceae
RN003972	NdTCP5	Ranunculaceae
NdCYL1_full	NdCYL1	Ranunculaceae
RN004309	NdCYL2	Ranunculaceae
Aqcoe3G395500	AqCYL2	Ranunculaceae
Aqcoe3G048600	AqCYL1	Ranunculaceae
NGS_Ran_2015_Aconitum_napellus/ACO_006049	Anap006049	Ranunculaceae
NGS_Ran_2015_Aconitum_napellus/ACO_019136	Anap019136	Ranunculaceae
NGS_Ran_2015_Aconitum_napellus/ACO_021922	Anap021922	Ranunculaceae
NGS_Ran_2015_Aconitum_napellus/ACO_042347	Anap042347	Ranunculaceae
NGS_Ran_2015_Aconitum_napellus/ACO_042348	Anap042348	Ranunculaceae
NGS_Ran_2015_Aconitum_napellus/ACO_013174	Anap013174	Ranunculaceae
NGS_Ran_2015_Clematis_stans/CLE_27179	Csta27179	Ranunculaceae
NGS_Ran_2015_Clematis_stans/CLE_28987	Csta28987	Ranunculaceae
NGS_Ran_2015_Clematis_stans/CLE_21593	Csta21593	Ranunculaceae
NGS_Ran_2015_Clematis_stans/CLE_30628	Csta30628	Ranunculaceae
NGS_Ran_2015_Clematis_stans/CLE_32868	Csta32868	Ranunculaceae
NGS_Ran_2015_Clematis_stans/CLE_29004	Csta29004	Ranunculaceae
NGS_Ran_2015_Ficaria_verna/FIC_17556	Fver17556	Ranunculaceae
NGS_Ran_2015_Ficaria_verna/FIC_07171	Fver07171	Ranunculaceae
NGS_Ran_2015_Ficaria_verna/FIC_16652	Fver16652	Ranunculaceae
NGS_Ran_2015_Helleborus_orientalis/HEL_14824	Hori14824	Ranunculaceae
NGS_Ran_2015_Helleborus_orientalis/HEL_14825	Hori14825	Ranunculaceae
NGS_Ran_2015_Helleborus_orientalis/HEL_04267	Hori04267	Ranunculaceae
NGS_Ran_2015_Helleborus_orientalis/HEL_07175	Hori07175	Ranunculaceae
NGS_Ran_2015_Helleborus_orientalis/HEL_07176	Hori07176	Ranunculaceae
NGS_Ran_2015_Helleborus_orientalis/HEL_07177	Hori07177	Ranunculaceae
NGS_Ran_2015_Helleborus_orientalis/HEL_07178	Hori07178	Ranunculaceae
NGS_Ran_2015_Helleborus_orientalis/HEL_07168	Hori07168	Ranunculaceae
NGS_Ran_2015_Helleborus_orientalis/HEL_07169	Hori07169	Ranunculaceae
NGS_Ran_2015_Helleborus_orientalis/HEL_22696	Hori22696	Ranunculaceae
KU051593.1 Dichocarpum stoloniferum isolate JS-2008-14 CYC-like protein 2 (CYL2) mRNA, partial cds	Disto2	Ranunculaceae
KU051587.1 Actaea racemosa isolate PBL011469 CYC-like protein 2 (CYL2) mRNA, partial cds	Acrac2	Ranunculaceae
KU051592.1 Clematis vitalba isolate JS-2008-02 CYC-like protein 2 (CYL2) mRNA, partial cds	Clvit2	Ranunculaceae
KU051584.1 Adonis vernalis isolate JBL26844 CYC-like protein 1 (CYL1h) mRNA, partial cds	Adver1	Ranunculaceae
KU051589.1 Thalictrum thalictroides isolate JS-2008-04 CYC-like protein 2 (CYL2) mRNA, partial cds	Ththa2	Ranunculaceae
KJ402035.1 Staphisagria picta CYC-like protein 1a (CYL1a) gene, partial cds	Stpic1a	Ranunculaceae
KJ401975.1 Nigella damascena CYC-like protein 1 (CYL1) gene, partial cds	Nidam1	Ranunculaceae
KU051567.1 Actaea racemosa isolate PBL011469 CYC-like protein 1 (CYL1c) mRNA, partial cds	Acrac1c	Ranunculaceae
KJ401986.1 Glaucidium palmatum CYC-like protein 1 (CYL1) gene, partial cds	Glpal1	Ranunculaceae
KU051572.1 Asteropyrum cavaleriei isolate JS-2008-17 CYC-like protein 1 (CYL1) mRNA, partial cds	Ascav1	Ranunculaceae
KJ402038.1 Aconitum napellus CYC-like protein 1a (CYL1a) gene, partial cds	Acnap1a	Ranunculaceae
KJ402034.1 Consolida regalis CYC-like protein 2a (CYL2a) gene, partial cds	Coreg2a	Ranunculaceae
KJ402046.1 Delphinium cheilanthum CYC-like protein 1a (CYL1a) gene, partial cds	Deche1a	Ranunculaceae
KJ402011.1 Aconitum napellus CYC-like protein 1b (CYL1b) gene, partial cds	Acnap1b	Ranunculaceae
KJ402007.1 Consolida regalis CYC-like protein 2b (CYL2b) gene, partial cds	Coreg2b	Ranunculaceae
KJ402019.1 Aconitum napellus CYC-like protein 2a (CYL2a) gene, partial cds	Acnap2b	Ranunculaceae
KU051568.1 Adonis vernalis isolate JBL26844 CYC-like protein 1 (CYL1g) mRNA, partial cds	Adver1g	Ranunculaceae
KJ402015.1 Staphisagria picta CYC-like protein 2a (CYL2a) gene, partial cds	Stpic2a	Ranunculaceae
KJ401955.1 Nigella damascena CYC-like protein 2 (CYL2) gene, partial cds	Nidam2	Ranunculaceae
KJ402026.1 Delphinium cheilanthum CYC-like protein 2a (CYL2a) gene, partial cds	Deche2a	Ranunculaceae
KJ401977.1 Ranunculus repens CYC-like protein 1 (CYL1) gene, partial cds	Rarep1	Ranunculaceae
KJ401982.1 Semiaquilegia adoxoides CYC-like protein 1 (CYL1) gene, partial cds	Seado1	Ranunculaceae
KJ401961.1 Isopyrum thalictroides CYC-like protein 2 (CYL2) gene, partial cds	Istha2	Ranunculaceae
KU051583.1 Trautvetteria caroliniensis isolate JS-2008-16 CYC-like protein 1 (CYL1) mRNA, partial cds	Trcar1	Ranunculaceae
KJ401974.1 Clematis recta CYC-like protein 1 (CYL1) gene, partial cds	Clrec1	Ranunculaceae
KJ401950.1 Anemone nemorosa CYC-like protein 2 (CYL2) gene, partial cds	Annem2	Ranunculaceae
KU051578.1 Eranthis hyemalis isolate PBL015551 CYC-like protein 1 (CYL1) mRNA, partial cds	Erhye1	Ranunculaceae
KJ401951.1 Pulsatilla vulgaris CYC-like protein 2 (CYL2) gene, partial cds	Puvul2	Ranunculaceae
KU051581.1 Paraquilegia anemonoides isolate RBGE1216*1019841088*A CYC-like protein 1 (CYL1) mRNA, partial cds	Paane1	Ranunculaceae
KJ401962.1 Semiaquilegia adoxoides CYC-like protein 2 (CYL2) gene, partial cds	Seado2	Ranunculaceae
KJ401946.1 Trollius europaeus CYC-like protein 2bis (CYL2bis) gene, partial cds	Treur2b	Ranunculaceae
KJ401985.1 Xanthorhiza simplicissima CYC-like protein 1 (CYL1) gene, partial cds	Xasim1	Ranunculaceae
KJ401972.1 Callianthemum anemonoides CYC-like protein 1 (CYL1) gene, partial cds	Caane1	Ranunculaceae
KU051569.1 Hepatica nobilis isolate JS-2008-10 CYC-like protein 1 (CYL1) mRNA, partial cds	Henob1	Ranunculaceae
KU051579.1 Hydrastis canadensis isolate RBGE1216*719820191*A CYC-like protein 1 (CYL1) mRNA, partial cds	Hycan1	Ranunculaceae
KJ401981.1 Isopyrum thalictroides CYC-like protein 1 (CYL1) gene, partial cds	Istha1	Ranunculaceae
KU051573.1 Caltha leptosepala isolate BFAG2005-159-QA CYC-like protein 1 (CYL1) mRNA, partial cds	Calep1	Ranunculaceae
KJ401970.1 Anemone nemorosa CYC-like protein 1 (CYL1) gene, partial cds	Annem1	Ranunculaceae
KJ401976.1 Ficaria verna CYC-like protein 1 (CYL1) gene, partial cds	Fiver1	Ranunculaceae
KU051576.1 Dichocarpum stoloniferum isolate JS-2008-14 CYC-like protein 1 (CYL1j) mRNA, partial cds	Disto1j	Ranunculaceae
KJ401971.1 Pulsatilla vulgaris CYC-like protein 1 (CYL1) gene, partial cds	Puvul1	Ranunculaceae
KJ401958.1 Trollius europaeus CYC-like protein 2 (CYL2) gene, partial cds	Treur2	Ranunculaceae
KJ401984.1 Coptis quinquefolia CYC-like protein 1 (CYL1) gene, partial cds	Coqui1	Ranunculaceae
KU051575.1 Dichocarpum stoloniferum isolate JS-2008-14 CYC-like protein 1 (CYL1i) mRNA, partial cds	Disto1i	Ranunculaceae
KU051574.1 Ceratocephala falcata isolate JBL026385 CYC-like protein 1 (CYL1) mRNA, partial cds	Cefal1	Ranunculaceae
KJ401987.1 Aconitella aconiti CYC-like protein 1a2 (CYL1a2) gene, partial cds	Acaco1a2	Ranunculaceae
KJ401952.1 Callianthemum anemonoides CYC-like protein 2 (CYL2) gene, partial cds	Caane2	Ranunculaceae
XM_026523486.1 PREDICTED: Papaver somniferum transcription factor TCP18-like (LOC113273917), mRNA	Pasom1	Papaveraceae
XM_026550368.1 PREDICTED: Papaver somniferum transcription factor CYCLOIDEA-like (LOC113301595), mRNA	Pasom2	Papaveraceae
XM_026530934.1 PREDICTED: Papaver somniferum protein roadkill-like (LOC113282017), mRNA	Pasom3	Papaveraceae
DQ347830.1 Hypecoum imberbe TCP1 (TCP1) gene, partial cds	Hyimb1	Papaveraceae
DQ347824.1 Eschscholzia californica subsp. californica TCP2 (TCP2) mRNA, partial cds	Escal2	Papaveraceae
DQ659319.1 Lamprocapnos spectabilis Cycloidea-like protein PapaCyL1 (CyL1) gene, partial cds	Laspec1	Papaveraceae
DQ659312.1 Cysticapnos vesicarius Cycloidea-like protein PapaCyL1 (CyL1) gene, partial cds	Cyves1	Papaveraceae
DQ659317.1 Hypecoum procumbens Cycloidea-like protein PapaCyL1 (CyL1) gene, partial cds	Hypro1	Papaveraceae
DQ659316.1 Dicentra torulosa Cycloidea-like protein PapaCyL2 (CyL2) gene, partial cds	Ditor2	Papaveraceae
DQ659311.1 Capnoides sempervirens Cycloidea-like protein PapaCyL2 (CyL2) gene, partial cds	Casem2	Papaveraceae
DQ659320.1 Lamprocapnos spectabilis Cycloidea-like protein PapaCyL2 (CyL2) gene, partial cds	Laspec2	Papaveraceae
MG893937.1 Cysticapnos vesicaria TCP/CYL protein (CYL2B) mRNA, partial cds	Cyves2b	Papaveraceae
DQ659309.1 Chelidonium majus Cycloidea-like protein PapaCyL2 (CyL2) gene, partial cds	Chmaj2	Papaveraceae
MG893934.1 Cysticapnos vesicaria TCP/CYL protein (CYL1A) mRNA, partial cds	Cyves1a	Papaveraceae
MG893936.1 Cysticapnos vesicaria TCP/CYL protein (CYL2A) mRNA, partial cds	Cyves2a	Papaveraceae
DQ659318.1 Hypecoum procumbens Cycloidea-like protein PapaCyL2 (CyL2) gene, partial cds	Hypro2	Papaveraceae
MG893935.1 Cysticapnos vesicaria TCP/CYL protein (CYL1B) mRNA, partial cds	Cyves1b	Papaveraceae
DQ347827.1 Fumaria vaillantii TCP1 (TCP1) mRNA, partial cds	Fuvail1	Papaveraceae
DQ347820.1 Eschscholzia californica subsp. californica TCP1 (TCP1) mRNA, partial cds	Escal1	Papaveraceae
DQ347819.1 Romneya coulteri TCP1 (TCP1) gene, partial cds	Rocou1	Papaveraceae
HQ599290.1 Akebia quinata CYC-like protein 1 gene, partial cds	Akqui1	Lardizabalaceae
HQ599289.1 Akebia quinata CYC-like protein 2 gene, partial cds	Akqui2	Lardizabalaceae
HQ599293.1 Circaeaster agrestis CYC-like protein 1a gene, partial cds	Ciagr1a	Circeasteraceae
HQ599294.1 Circaeaster agrestis CYC-like protein 1b gene, partial cds	Ciagr1b	Circeasteraceae
HQ599291.1 Nandina domestica CYC-like protein gene, partial cds	Nadom1	Berberidaceae
HQ599292.1 Epimedium alpinum CYC-like protein gene, partial cds	Epalp	Berberidaceae
gnl|onekp|QTJY_scaffold_2001504 Euptelea_pleiosperma	Euple1	Eupteleaceae
gnl|onekp|QTJY_scaffold_2059133 Euptelea_pleiosperma	Euple2	Eupteleaceae
gnl|onekp|NMGG_scaffold_2064277 Hypecoum_procumbens	Hypro3	Papaveraceae
gnl|onekp|NMGG_scaffold_2063400 Hypecoum_procumbens	Hypro4	Papaveraceae
gnl|onekp|LVNW_scaffold_2010411 Cocculus_laurifolius	Colau	Menispermaceae
gnl|onekp|YHFG_scaffold_2072878 Nandina_domestica	Nadom2	Berberidaceae
gnl|onekp|YHFG_scaffold_2073016 Nandina_domestica	Nadom3	Berberidaceae
gnl|onekp|ERXG_scaffold_2017551 Eschscholzia_californica	Escal4	Papaveraceae
gnl|onekp|GOQJ_scaffold_2054022 Argemone_mexicana	Armex	Papaveraceae

## Sheet: SupTable4
Conditions for PCR amplification of TCP genes in N. damascena
Gene name	Primer pair	Ann t°	Cycle nb
NdTCP7	U96-L594	59	25
NdTCP15-1	U431-L930	59	28
NdTCP15-2	U5-L416	59	28
NdTCP11	U163-L640	59	28
NdTCP20-1	U358-L768	59	28
NdTCP20-2	U232-L558	59	28
NdTCP9-1	U724-L1210	58	28
NdTCP9-2	U301-L767	59	28
NdTCP22	U387-L873	58	28
NdTCP2	U762-L1142	59	25
NdTCP5	U316-L803	59	33
NdTCP4	U2191-L2488	59	28
NdCYL1	U258-L461	58	33
NdCYL2	U569-L881	58	33
Actin	Actin_U-Actin_L	52	28

## Sheet: SupTable5A
Conserved amino acid motifs detected in the class I TCP proteins of seven angiosperm species
Order of the amino acid motifs detected on sequences											Below: Logos of the motifs detected in the seven species analysis							Colour code of the motifs and their correspondance in the seven species and Ranunculales analyses
	in the seven species analysis																	7 species		Ranunculales
TCP7-like																		MI1		MRI1
ATr00029																		MI2		MRI2
Aq3G008000																		MI3		MRI3
RN005256																		MI4	include (box)	MRI7
NNU000404																		MI5	overlap	MRI4
NNU47915																		MI6	included in	MRI5
AtTCP7																		MI7	overlap	MRI6
AtTCP21																		MI8
Vv26145																		MI9
Os02g42380																		MI10	overlap	MRI8
Os04g44440
TCP11-like
ATr00009
AtTCP11
NNU022609
VvTCP11
Os04g11830
Aq1G137200
RN071097
TCP15-like
ATr00010
Aq3G335300
RN048267
NNU60090
NNU58787
Vv20011
Aq3G081500
RN067927
Vv08023
Os02g51280
Os06g12230
AtTCP15
AtTCP14
TCPP22-like
ATr00017
Vv23283
AtTCP8
VvTCP8
AtTCP22
AtTCP23
Os11g07460
Os12g07480
Aq6G015800
RN054028
TCP20-like
ATr00016
Aq5G347900
RN010851
Aq3G164300
RN015628
NNU003157
NNU52336
VvTCP20
AtTCP20
AtTCP6
AtTCP16
Os01g69980
TCP9-like
ATr00069
Aq7G051800
RN006358
NNU006850
NNU74283
Vv27588
Vv19876
AtTCP9
Aq5G422600
RN065983
AtTCP19
Os08g43160
Os09g34950

## Sheet: SupTable5B
Conserved amino acid motifs detected in the class II TCP proteins of seven angiosperm species
Order of the amino acid motifs detected on sequences											Below: Logos of the motifs detected in the seven species analysis								Colour code of the motifs and their correspondance in the seven species and Ranunculales analyses
	in the seven species analysis																		7 species		Ranunculales
CIN1																			MII1		MRII1
Aq1G240000																			MII2		MRII2
RN002982																			MII3		partial, 3' end of MII1
NNU020671																			MII4		MRII7
Vv14236																			MII5		MRII5
AtTCP3																			MII6		MRII10
AtTCP4																			MII7
Os01g11550																			MII8		MRII8
ATr00007																			MII9		MRII3
ATr00021																			MII10		3' end of MII4
Vv20666
Vv21167
AtTCP10
ATr00029
ATr00119
ATr00133
ATr00224
ATr00357
CIN2a
NNU000986
NNU59728
Os12g42190
AtTCP13
Aq3G370100
RN003972
ATr00154
Vv32911
Vv08109
AtTCP5
AtTCP17
Os01g55750
Os05g43760
Os12g02090
Os02g51310										no motifs detected
CIN2b
Aq4G007100
RN009083
NNU019579
NNU026089
Vv21528
AtTCP2
AtTCP24
ATr00092
Os07g05720
Os03g57190
CYC/TB1
Aq3G048600
NdCYL1_comp
NNU001168
NNU66979
Vv08234
Vv36449
Vv11962
AtTCP12
Os03g49880
AtTCP1
AtTCP18
RN004309
Aq3G395500
Os08g33530
Os09g24480
